# Supplementary material
Source: publisher site journal article supplement (https://www.dovepress.com/article/415376)
Supplement: Supplementary file 1 [file get_supplementary_file.php]

**Supplementary 1: Sampling procedure.**

3 district Randomly selected.

Jimma Zone 23 district (5 interventional districts selected) (8,842) (404)

Gera district (15primary school) (1770)

Shebe-Sombo district (15primary School) (1770)

Limmu-Kossa District (15primaryschool) (1770)

5primary School (590)

5primary School (590)

5primary School (590)

5(6th 7th and 8th grade) (27)

5(6th 7th and 8th grade) (27)

5(6th 7th and 8th grade) (27)

9 per grade (5*3*9) (135) students from all)

9 per grade (5*3*9) (135 students from all)

9 per grade (5*3*9) (135 students from all)

Equal allocation

Supplementary figure 1-The diagrammatic presentation of the Sampling procedures of trained peer educators who participated in the study in Jimma Zone, Ethiopia 2020.

**Supplementary 2 Questionnaire**

**Name of investigator**: __________________**Address:** Jimma University, Institute of Health, Faculty of Public Health

**Survey questionnaires in English version. An Interviewed administered questionnaire for Primary school students.**

| **Part I: Socio-demographic characteristics** | | |
| --- | --- | --- |
|  | Items | Alternatives |
|  | District name | ______________ |
|  | Altitude at the center of the Kebele |  |
|  | Kebele name | ______________ |
|  | School name | ______________ |
|  | Residence | 1. Urban 2. Rural |
|  | What is your age? | _______[completed years] |
|  | Sex | 1. Male 2. Female |
|  | Grade Level | 1. 6th 2.7th, 3. 8th |
|  | What is your latest average grade point? | Mention:__________________ |
|  | What is your (best) favorite subject? | Mention: _________________ |
|  | Role in the class? | 1. Leader 2. Deputy leader 3. Other_______ |
|  | What is your religion | 1. Muslim 2. Orthodox 3. Protestant 4. Other [specify]________ |
|  | What is your ethnicity | 1. Oromo 2. Ahmara   3. kafa 4. Other] ________ |
|  | What is the number of people you live with within the family? (Who lived for >=6 months) | Mention: _______(Male:_____, Female____) |
|  | Did you participate in any health intervention training, other than this project so far? | 1. yes  2. No |
|  | If Yes, on Q15 please mention here | 1. ___________________ 2. ___________________ 3. ____________________ |

| Part II: knowledge about malaria, risk perceptions (susceptibility and severity), and PLEA practiced on/about malaria that engaged school-based malaria prevention and control Jimma Zone, Ethiopia. | | | | | | | | | |
| --- | --- | --- | --- | --- | --- | --- | --- | --- | --- |
|  | Knowledge items and malaria preventive behaviors | | Answers | | | | | | |
|  | Have you ever heard of or know of an illness called malaria/woba/busa? | | 1. Yes 2. No | | | | | | |
|  | Can you tell me the main symptoms of malaria?  Don’t read the options  MULTIPLE RESPONSES  PROBE ONCE (Anything else?) | | 1. Don’t know. 2. Fever 3. Feeling cold 4. Headache 5. Nausea and Vomiting 6. Diarrhea 7. Dizziness 8. Loss of appetite/refusal to eat/drink 9. Body ache or joint pain 10. Pale eyes 11. Body weakness 12. Other (Specify)________ | | | | | | |
|  | In your opinion, what causes malaria?  Don’t’ read the option.  MULTIPLE RESPONSES  PROBE ONCE (Anything else?) | | 1. don’t know. 2. Mosquito bites 3. Eating sugarcane 4. hunger (empty stomach) 5. Drinking other dirty water 6. Getting soaked in the rain 7. Cold or changing weather 8. Lack of hygiene 9. shaking hands of a person with malaria 10. Other (Specify)________ | | | | | | |
|  | How can a person protect themselves against malaria?  Don’t read the options.  MULTIPLE RESPONSES  PROBE ONCE (Anything else?) | | 1. Don’t know. 2. Sleep under a mosquito net 3. Using repellants 4. not staying out of home at night 5. Spray the house with insecticide. 6. Keep house surroundings clean. 7. Fill in puddles (stagnant water) 8. Don’t get soaked in rain. 9. early diagnosis and treatment for fever 10. antimalarial drug compliance 11. Other (Specify)________ | | | | | | |
|  | In your opinion, who is most likely to get a serious case of “malaria” among families? | | 1. don’t know. 2. Adult man 3. Adult women 4. Pregnant women and children under 3 years 5. A child of six years old | | | | | | |
|  | **Malaria preventive Behaviors** | | Answers | | | | | | |
|  | Does your household have mosquito nets that can be used while sleeping? | | 1. Yes 2. No | | | | | | |
|  | How many mosquito nets does your family/household have? | | ______[number of nets] | | | | | | |
|  | Did you sleep under the net the previous night? | | 1. yes 2. no | | | | | | |
|  | Would you mention some of the activities you participate in for the purpose of controlling mosquito breeding last time? | | 1. Nothing 2. Clean/dispose of stagnant water around the school/ Home 3. Planting flower | | | | | | |
|  | Clean/dispose of stagnant water around the school/ Home | | 1. yes 2. no | | | | | | |
|  | Did you seek advice or treatment for the fever from any source? | | | 1. Yes 2. No | | | | | |
|  | How many days after the fever began did you seek treatment? | | | Mention:______________ (in days) | | | | | |
|  | Was the case or fever confirmed by health workers? | | | 1. Yes 2. No | | | | | |
|  | The best place to seek treatment for a fever/malaria is health facility | | | 1. Yes 2. No | | | | | |
|  | Appropriate use of prescribed Anti-malarial drugs essential for malaria prevention and Control | | | 1. Yes 2. No | | | | | |
|  | Stopping taking the prescribed medicine when fever goes is normal | | | 1. Yes 2. No | | | | | |
|  | Indoor residual spraying (IRS) should be used every 6 months. | | | 1. Yes 2. No | | | | | |
|  | Using repellants at night are used for preventing malaria. | | | 1. Yes 2. No | | | | | |
|  | **Knowledge on EMAs**  Would you please mention the eight essential malaria actions (EMAs) which have been implemented in this school over the last two and half years?  NOTE: Don’t read from the questions, just PROBE and record (tick) the response as they mention | 1. I don’t know. 2. All family members should sleep under LLINs, every night. 3. Give priority to pregnant women and children under five (U5) to sleep under LLINs, every night. 4. Whenever a family member has a fever, take them to the nearest health facility, immediately. 5. Take a full dose of the anti-malaria drugs prescribed to you by health personnel, including HEWs. 6. Do not interrupt or share your anti-malaria drugs prescribed to you by health personnel. 7. Cooperate with sprayers during the indoor residual spraying (IRS) period. 8. Do not re-plaster your home for six months after your house has been sprayed. 9. Wash your LLIN with „regular‟ soap and hang or lay to dry in the shade. 10. Others; ___________________________ | | | | | | | |
|  | **Peer education practice in school** |  | | | | | | | |
|  | Did you have peer education activities on malaria issues in your schools in the last two years? | 1. Yes 0. No | | | | | | | |
|  | If YES; what was the schedule? | 1. Every day 4. Every three weeks 2. Every week 5. Every four weeks 3. Every two weeks 6. Only sometimes | | | | | | | |
|  | Do you currently conduct peer education activities on malaria issues in your schools? | 1. Yes 0. No | | | | | | | |
|  | If YES; what is the schedule? | 1. Every day 4. Every three weeks 2. Every week 5. Every four weeks 3. Every two weeks 6. Only sometimes | | | | | | | |
|  | What is the number of individuals/members in your team of peer education? | 1. Four 2. Five 3. Six 4. Seven 5. More than seven | | | | | | | |
|  | What is the number of female students in your team? | 1. One 2. Two 3. Three 4. Four 5. Five and more | | | | | | | |
|  | What were the criteria used to select group members for peer education teams? | 1. Based on proximity (neighborhood) 2. Based on the gender mix 3. Based on academic performances 4. Based on your seats in the class 5. Based on friendship 6. Others; ______________________ | | | | | | | |
|  | **Perceived susceptibility to risk of malaria: Now, I ask about your beliefs about the likelihood of your exposure to malaria. [Read the responses, & check ‘√” in front of each question under the responded option]** | | | | **SD=1** | **D=2** | **UD=3** | **A=4** | **SA=5** |
|  | I feel that the chances are high that I can get malaria | | | |  |  |  |  |  |
|  | During the rainy season, I worry almost every day that I may get malaria* | | | |  |  |  |  |  |
|  | People only get malaria when there are lots of mosquitoes | | | |  |  |  |  |  |
|  | People in this community only get malaria during the rainy season | | | |  |  |  |  |  |
|  | Every year, someone in this community gets a serious case of malaria* | | | |  |  |  |  |  |
|  | A pregnant woman is more at risk of malaria than another person | | | |  |  |  |  |  |
|  | **Perceived severity of risk of malaria [check ‘√” in front of each question)** | | | | **1** | **2** | **3** | **4** | **5** |
|  | Infections with malaria can potentially lead to death | | | |  |  |  |  |  |
|  | For someone malaria, I usually expect to completely recover in a few days* | | | |  |  |  |  |  |
|  | Malaria can seriously affect pregnant woman and her fetus | | | |  |  |  |  |  |
|  | I may drop schooling if I caught malaria | | | |  |  |  |  |  |
|  | Infection from malaria may reduce my school achievement | | | |  |  |  |  |  |

* Reversable questions or Negative questions
